# Supplementary material
Source: PubMed Central journal article supplement (PMC3676073)

**Supplementary data to the manuscript:**

**”Maltose uptake by the novel ABC-transport system MusEFGK<sub>2</sub>I causes increased expression of *ptsG* in *Corynebacterium glutamicum*”**

by Alexander Henrich, Nora Kuhlmann, Alexander W. Eck, Reinhard Krämer, and Gerd M. Seibold

**The supplementary data comprise one table (Table S1) and four figures (FIG. S1, FIG. S2, FIG. S3, FIG. S4).**

TABLE S1. Oligonucleotides used in this study.

| Name       | Sequence (5'-3')                                                      | Purpose, restriction site                               |
|------------|-----------------------------------------------------------------------|---------------------------------------------------------|
| DelMus_1   | GGGGATCCAACCGCGAACTGCT                                                | Deletion of <i>mus</i> genes, BamHI                     |
| DelMus_2   | CTTATAAAATTTGGAGTGTGAAGGTTATTGCGTGCGAACGATCCGTAGTGTGAG                | Deletion of <i>mus</i> genes                            |
| DelMus_3   | CACGCAATAACCTTCACACTCCAAATTTATAAGACGACTACCTGCTGCCATAC                 | Deletion of <i>mus</i> genes                            |
| DelMus_4   | GGGGATCCTGCCTTGGCAATGA                                                | Deletion of <i>mus</i> genes, BamHI                     |
| ΔMusConF   | TAGATGGCGCACAGTGACTC                                                  | Verification of <i>mus</i> deletion                     |
| ΔMusConR   | TAACTACCGCAACACCGATG                                                  | Verification of <i>mus</i> deletion                     |
| DelPtsG_1  | GTCGACGGGCATAATTCTGACAGTGTG                                           | Deletion of <i>ptsG</i> , Sall                          |
| DelPtsG_2  | CTTATAAAATTTGGAGTGTGAAGGTTATTGCGTGGGACGCCAAGAAGTATGGG                 | Deletion of <i>ptsG</i>                                 |
| DelPtsG_3  | CACGCAATAACCTTCACACTCCAAATTTATAAGCCGCTGACTTCATTCGATCC                 | Deletion of <i>ptsG</i>                                 |
| DelPtsG_4  | GGATCCTAAGGACGCCATGTCAAACC                                            | Deletion of <i>ptsG</i> , BamHI                         |
| ΔPtsGConF  | TCGTACGGTGTGGTTAAG                                                    | Verification of <i>ptsG</i> deletion                    |
| ΔPtsGConR  | AGTATGCACCGCGTAATC                                                    | Verification of <i>ptsG</i> deletion                    |
| MusFor     | TCTAGATGGCGCACAGTGACTCACTT                                            | Cloning of pXMJ19-musEFGK and pXMJ19-musEFGKI, XbaI     |
| MusRev     | ACCGGTCGAGTATGCGATTCATGGT                                             | Cloning of pXMJ19-musEFGK, AgeI                         |
| MusLoRev   | GGGGATCCATGACGTGGATAACCACTACC                                         | Cloning of pXMJ19-musEFGKI and pXMJ19-cg2701, BamHI     |
| MusI-For   | GGGGATCCTTCTCCACGCAGAGGCACAT                                          | Cloning of pXMJ19-cg2701 and pXMJ19-cg2701-strep, BamHI |
| MusI-Rev   | GAGCTCTCAATTTTTCGAAGTGCAGGTTGGCTCCAGCTGCGACCGCTACCGCTGCAAAGGGGCTATCGG | Cloning of pXMJ19-cg2701-Strep, SacI                    |
| Cg2703_for | GCTTCTTGGAGCCACATTG                                                   | RT-PCR, cg2703 RNA Probe, inactivation of cg2703        |
| Cg2703_rev | GGGCCCTAATACGACTCACTATAGGGTATCGCGGTTACCGTTGGAG                        | RT-PCR, cg2703 RNA Probe, inactivation of cg2703        |

|                                  |                                                       |                                                                                          |
|----------------------------------|-------------------------------------------------------|------------------------------------------------------------------------------------------|
| Cg2708_for                       | ACTGAAGATCGCCGGCAAGT                                  | RT-PCR, cg2708 RNA Probe, inactivation of cg2708                                         |
| Cg2708_rev                       | <i>GGGCCCTAATACGACTCACTATAGGGATTATCCTCCGGCGTCATGG</i> | RT-PCR, cg2708 RNA Probe, inactivation of cg2708                                         |
| Cg2707_for                       | CCTATTCGCTATCTCGTC                                    | RT-PCR, cg2707 RNA Probe, inactivation of cg2707                                         |
| Cg2707_rev                       | <i>GGGCCCTAATACGACTCACTATAGGGGCGATAGTCGGTTCGTATT</i>  | RT-PCR, cg2707 RNA Probe, inactivation of cg2707                                         |
| Cg2701_for                       | TTCGCTGACCTAGTCATCGT                                  | RT-PCR, cg2701 RNA Probe, inactivation of cg2701                                         |
| Cg2701_rev                       | <i>GGGCCCTAATACGACTCACTATAGGGACTGCGAGGAAGAACAGGTA</i> | RT-PCR, cg2701 RNA Probe, inactivation of cg2701                                         |
| PrmusF-for                       | <u>TCTAGA</u> ATGACA <b>ACTGGGCTGCTGAG</b>            | musF-Pr probe, cloning of pET2- <i>PmusF</i> , <i>XbaI</i>                               |
| PrmusF-TS-for                    | <u>TCTAGATCTCCTC</u> ACCGCCTTCC                       | Cloning of pET2- <i>PmusF-TS</i> , <i>XbaI</i>                                           |
| PrmusF-rev                       | <u>GGATCCTTATGGCGTTGGTGATAGTGGTG</u>                  | musF-Pr probe, cloning of pET2- <i>PmusF</i> and pET2- <i>PmusF-TS</i> ,<br><i>BamHI</i> |
| ramBp3b_forw                     | ACGCGTCGACGATGTGGCCCCGACCACGCCG                       | <i>ramBp3b</i> probe                                                                     |
| ramBp3b_rev                      | ACTGAGGTGTTGCAA <b>ACTGTTGATTTTCGCT</b>               | <i>ramBp3b</i> probe                                                                     |
| RACE-cg2704-SP1                  | AAGTTGGTACCGCGGAGT                                    | 5'-RACE. cDNA synthesis                                                                  |
| RACE-cg2704-SP2                  | AGGCGAAATGTTGACTG                                     | 5'-RACE, nested primer                                                                   |
| Oligonucleotide<br>anchor primer | dT GACCACGCGTATVGATGTCGACTTTTTTTTTTTTTTTTTT           | 5'-RACE, amplification of dA-tailed cDNA                                                 |

<sup>a</sup> Restriction sites in the oligonucleotides are underlined, V represents an A, C, or G, linker sequences for cross over PCR are shown in bold, T7-promoter sequences for *in vitro* transcription are shown in italics, the sequences encoding the strep-tag and the linker in the oligonucleotide MusI-rev are shown in red and green, respectively.

**FIG. S1.** Maltose uptake of *C. glutamicum* WT, different concentrations (0.5 - 30  $\mu\text{M}$ ) of [ $^{14}\text{C}$ ]-maltose were tested. Data represent mean values of three independent measurements from 2 independent cultivations and were fitted according to the Michaelis-Menten equation.

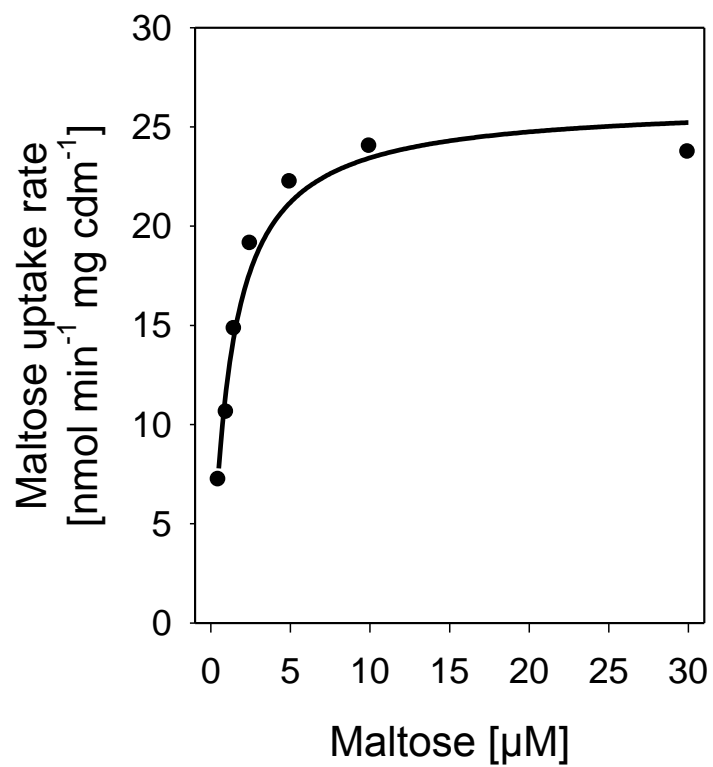



**FIG. S3.** Alignment of *C. glutamicum* MusI with the hypothetical proteins from *B. longum* NCC2705, *S. agalactiae* 2603 and *S. pneumonia* TIGR4, each contains 5 transmembrane regions, the DUF 624 motif (residues 30 to 101 in the amino acid sequence of SP\_1677) and is encoded adjacent to an genes for an ABC transport system. Amino acids identical in three sequences are shaded in black and similar amino acids are shaded in grey.

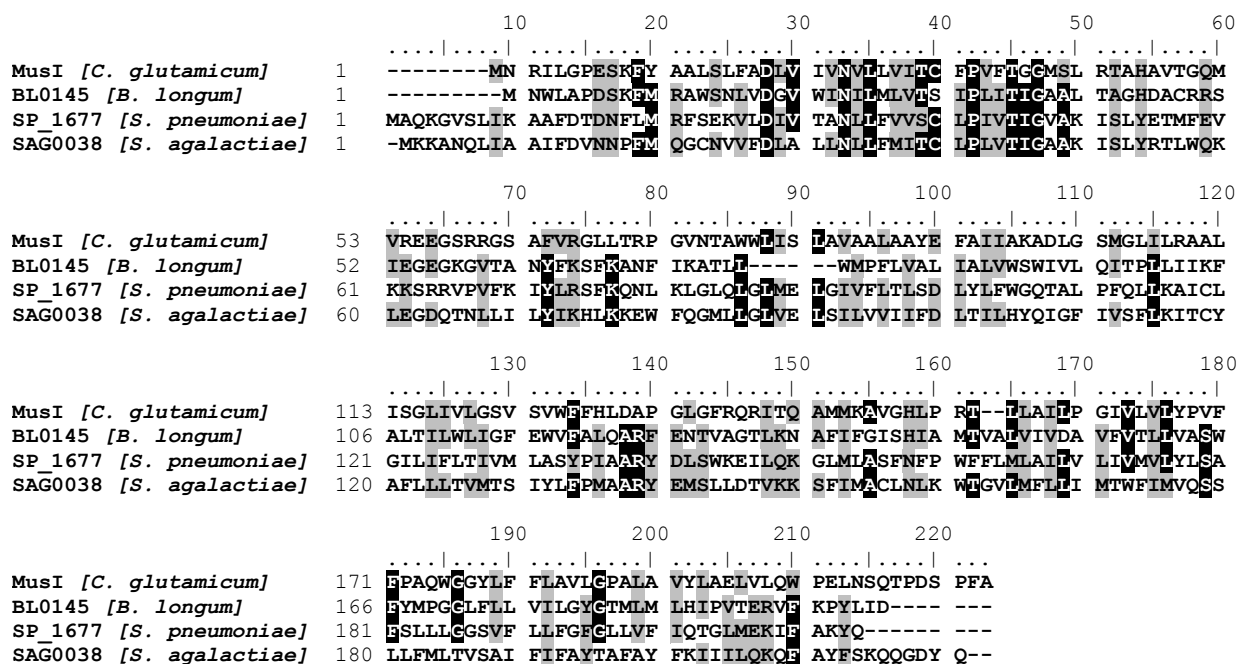

**FIG. S4.** Genomic organisation of gene clusters from *C. glutamicum* ATCC13032, *B. longum* NCC2705, *S. agalactiae* 2603 and *S. pneumoniae* TIGR4 encoding ABC-transporters. Genes encoding *musI*-like proteins are shown in red, genes for permeases in yellow, substrate binding proteins in green, and ATPase in blue. Genes encoding additional (hypothetical) proteins are coloured in grey.

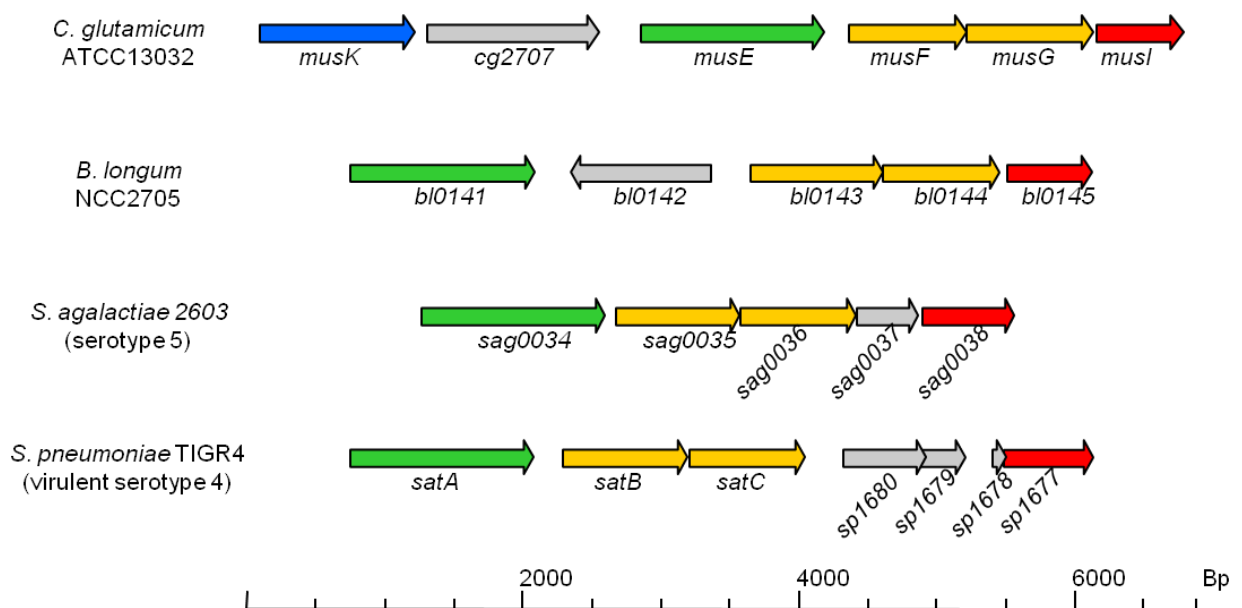

Supplement: JB.01629-12_zjb999092609so1.pdf [file JB.01629-12_zjb999092609so1.pdf]
